# Supplementary material
Source: PubMed Central journal article supplement (PMC3241750)
Supplement: 1111079108_pnas.1111079108_SI.pdf [file 1111079108_pnas.1111079108_SI.pdf]

# Supporting Information

Olson et al. 10.1073/pnas.1111079108

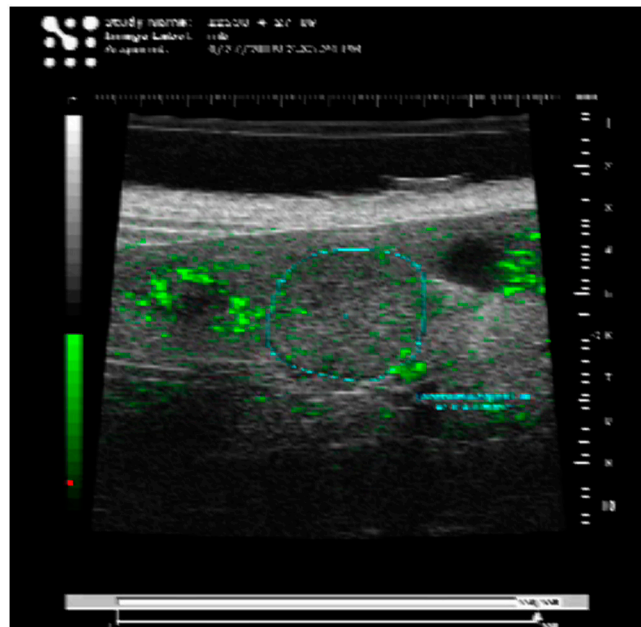

**Movie S1.** Microbubble contrast-enhanced ultrasound reveals reduction in blood perfusion following sunitinib treatment. Pancreatic neuroendocrine tumor before sunitinib treatment.

[Movie S1 \(MOV\)](#)

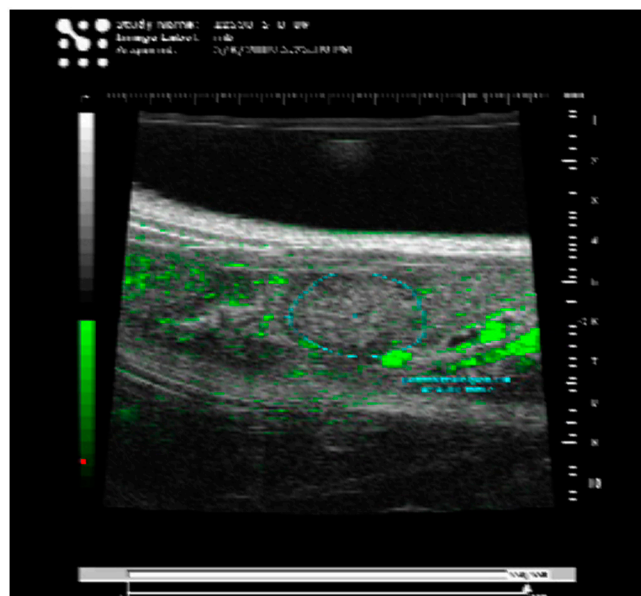

**Movie S2.** Microbubble contrast-enhanced ultrasound reveals reduction in blood perfusion following sunitinib treatment. Pancreatic neuroendocrine tumor after sunitinib treatment.

[Movie S2 \(MOV\)](#)

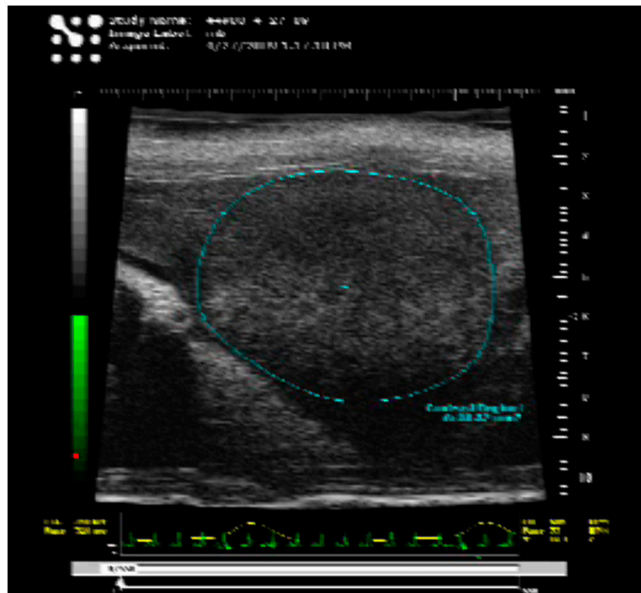

**Movie S3** Pancreatic ductal adenocarcinoma tumor before sunitinib treatment.

[Movie S3 \(MOV\)](#)

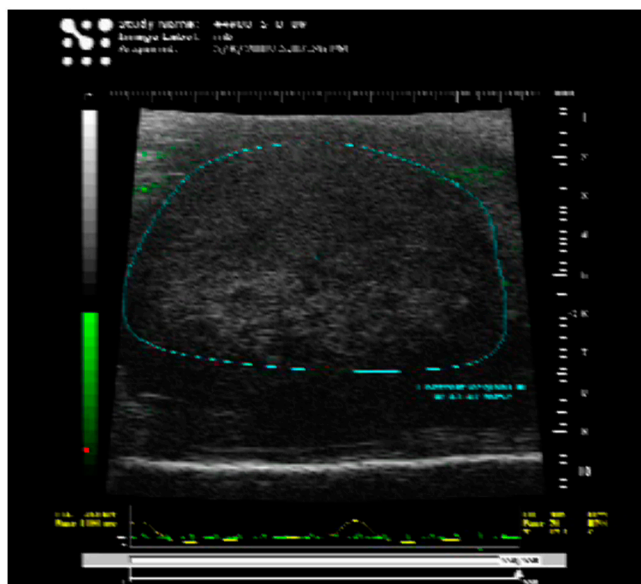

**Movie S4** Pancreatic ductal adenocarcinoma tumor after sunitinib treatment.

[Movie S4 \(MOV\)](#)
